# Supplementary material for: Breast and Lung Cancer Screening Among Medicare Enrollees During the COVID-19 Pandemic
Source: PubMed Central journal article supplement (PMC9898823; doi:10.1001/jamanetworkopen.2022.55589), 2023-02-03
Supplement: jamanetwopen-e2255589-s002.pdf [file jamanetwopen-e2255589-s002.pdf]

## Data Sharing Statement

Doan. Breast and Lung Cancer Screening Among Medicare Enrollees During the COVID-19 Pandemic. *JAMA Netw Open*. Published February 03, 2023.

doi:10.1001/jamanetworkopen.2022.55589

### Data

**Data available:** No

### Additional Information

**Explanation for why data not available:** This data is covered by a Data Use Agreement, which researchers will need to complete to access the data.
